# Supplementary material
Source: PubMed Central journal article supplement (PMC9016233)
Supplement: thoraxjnl-2021-217580supp001.pdf [file thoraxjnl-2021-217580supp001.pdf]

**Supplementary File****Supplemental Table 1: COVID-19 hospitalisation and mortality by demographics and medical conditions, 1 March – 30 April 2020**

| Category                                    | Cohort:             | Hospitalisations: | Deaths:           |
|---------------------------------------------|---------------------|-------------------|-------------------|
| Total                                       | 4,392,014 (100%)    | 5,519 (100%)      | 2,693 (100%)      |
| <b>Sex:</b>                                 |                     |                   |                   |
| Male                                        | 2,117,752 (48.22 %) | 2,919 (52.89 %)   | 1,402<br>(52.06%) |
| Female                                      | 2,274,262 (51.78 %) | 2,600 (47.11 %)   | 1,291<br>(47.94%) |
| <b>Age band:</b>                            |                     |                   |                   |
| 19-29                                       | 779,120 (17.74 %)   | 109 (1.97 %)      | 1 (0.04%)         |
| 30-39                                       | 722,944 (16.46 %)   | 206 (3.73 %)      | 6 (0.22%)         |
| 40-49                                       | 676,503 (15.40 %)   | 402 (7.28 %)      | 33 (1.23 %)       |
| 50-59                                       | 791,298 (18.02 %)   | 875 (15.85 %)     | 111 (4.12%)       |
| 60-69                                       | 651,244 (14.83 %)   | 933 (16.91 %)     | 218 (8.10 %)      |
| 70-79                                       | 481,239 (10.96 %)   | 1,245 (22.56 %)   | 661 (24.55 %)     |
| 80-89                                       | 240,395 (5.47 %)    | 1,323 (23.97 %)   | 1,087(40.36%)     |
| 90+                                         | 49,271 (1.12 %)     | 426 (7.72 %)      | 576 (21.39 %)     |
| <b>BMI (integer):</b>                       |                     |                   |                   |
| 0-19                                        | 112,163 (2.55 %)    | 184 (3.33 %)      | 133 (4.94%)       |
| 20-24                                       | 631,075 (14.37 %)   | 717 (12.99 %)     | 446 (16.56 %)     |
| 25-29                                       | 788,663 (17.96 %)   | 1,157 (20.96 %)   | 474 (17.60 %)     |
| 30-34                                       | 447,812 (10.20 %)   | 859 (15.56 %)     | 283 (10.51 %)     |
| 35-39                                       | 19,106 (4.35 %)     | 432 (7.83 %)      | 124 (4.60 %)      |
| 40-51                                       | 103,436 (2.36 %)    | 280 (5.07 %)      | 55 (2.04 %)       |
| Missing                                     | 2,289,759 (52.13%)  | 1,890 (34.35%)    | 1,535 (57.00)     |
| <b>Townsend Deprivation Score Quintile:</b> |                     |                   |                   |
| 1 (most affluent)                           | 879,499 (20.02 %)   | 843 (15.27 %)     | 387 (14.37 %)     |
| 2                                           | 878,397 (20.00 %)   | 991 (17.96 %)     | 525 (19.49 %)     |
| 3                                           | 874,417 (19.91%)    | 1,095 (19.84 %)   | 589 (21.87 %)     |
| 4                                           | 869,324 (19.79 %)   | 1,222 (22.14 %)   | 495 (18.38 %)     |

|                                                   |                     |                 |                |
|---------------------------------------------------|---------------------|-----------------|----------------|
| 5 (least affluent)                                | 864,246 (19.68 %)   | 1,326 (24.03 %) | 660 (24.51 %)  |
| Missing                                           | 26,221 (0.60%)      | 42 (0.76%)      | 37 (1.37%)     |
| <b>Chronic Kidney Disease:</b>                    |                     |                 |                |
| No CKD                                            | 4,248,993 (96.74 %) | 4,586 (83.09 %) | 2,058 (76.42%) |
| CKD 3                                             | 133,142 (3.03 %)    | 823 (14.91 %)   | 565 (20.98 %)  |
| CKD 4                                             | 5,683 (0.13%)       | 53 (0.96 %)     | 45 (1.67 %)    |
| CKD 5                                             | 4,197 (0.1%)        | 57 (1.03 %)     | 25 (0.93 %)    |
| Atrial Fibrillation                               | 97,204 (2.21%)      | 577 (10.45%)    | 375 (13.92%)   |
| Asthma                                            | 503,416 (11.46%)    | 797 (14.44%)    | 209 (7.76%)    |
| Blood cancer                                      | 19,421 (0.44%)      | 105 (1.90%)     | 43 (1.60%)     |
| Congestive Cardiac Failure                        | 44,168(1.01%)       | 319 (5.78%)     | 184 (6.83%)    |
| Cerebral Palsy                                    | 5,255 (0.12%)       | 13 (0.24%)      | 4 (0.15%)      |
| Coronary heart disease                            | 184,136 (4.19%)     | 846 (15.33%)    | 540 (20.05%)   |
| Liver cirrhosis                                   | 21, 556 (0.49%)     | 77 (1.40%)      | 32 (1.19%)     |
| Congenital heart disease                          | 34,020 (0.77%)      | 104 (1.88%)     | 49 (1.82%)     |
| COPD                                              | 122,428 (2.79%)     | 575 (10.42%)    | 341 (12.66%)   |
| Dementia                                          | 37,181 (0.85%)      | 400 (7.25%)     | 749 (27.81%)   |
| Diabetes Type 1                                   | 19,282 (0.44%)      | 49 (0.89%)      | 13 (0.48%)     |
| Diabetes Type 2                                   | 233,889 (5.33%)     | 1,059 (19.19%)  | 474 (17.6%)    |
| Epilepsy                                          | 57,233 (1.30%)      | 142 (2.57%)     | 70 (2.60%)     |
| Hip, wrist, spine, humerus fracture               | 169,547 (3.86%)     | 557 (10.09%)    | 437 (16.23%)   |
| Neurological conditions                           | 16,456 (0.37%)      | 52 (0.94%)      | 24 (0.89%)     |
| Parkinson's                                       | 9,106 (0.21%)       | 92(1.67%)       | 80 (2.97%)     |
| Pulmonary hypertension                            | 8,298 (0.19%)       | 68 (1.23%)      | 45 (1.67%)     |
| Cystic fibrosis, bronchiectasis or alveolitis.    | 21,104 (0.48%)      | 103 (1.87%)     | 44 (1.63%)     |
| Peripheral vascular disease                       | 40,279 (0.92%)      | 210 (3.81%)     | 126 (4.68%)    |
| SLE or rheumatoid arthritis                       | 42,343 (0.96%)      | 143 (2.59%)     | 59 (2.19%)     |
| Lung, oral cancer                                 | 10,212 (0.23%)      | 80 (1.45%)      | 44 (1.63%)     |
| Severe mental illness                             | 486,310 (11.07%)    | 902 (16.34%)    | 364 (13.52%)   |
| Sickle cell disease or combined immune deficiency | 2,706(0.6%)         | 6 (0.11%)       | 1 (0.04%)      |

|                                    |                 |              |              |
|------------------------------------|-----------------|--------------|--------------|
| syndrome                           |                 |              |              |
| Stroke, transient ischaemic attack | 110,004 (2.50%) | 648 (11.74%) | 452 (16.78%) |
| Venous thromboembolism             | 68,763 (1.57%)  | 332 (6.02%)  | 181 (6.72%)  |

BMI - body mass index, COPD – chronic obstructive pulmonary disease, SLE - systemic lupus erythematosus, motor neurone disease, multiple sclerosis, myaesthesia, or Huntingtons's chorea.

**Supplemental Table 2: Covid-19 hospitalisation and mortality by demographics and medical conditions, 1 May – 30 June 2020**

| <b>Category:</b> | <b>Cohort:</b>      | <b>Hospitalisations:</b> | <b>Deaths:</b> |
|------------------|---------------------|--------------------------|----------------|
| Total            | 4,382,821           | 5,446                    | 1,300          |
| <b>Sex:</b>      |                     |                          |                |
| Male             | 2,113,159 (48.21 %) | 2,690 (49.39 %)          | 599 (46.08%)   |
| Female           | 2,269,662 (51.79 %) | 2,756 (50.61 %)          | 701 (53.92%)   |
| <b>Age band:</b> |                     |                          |                |
| 19-29            | 778,219 (17.76 %)   | 149 (2.74 %)             | 0 (0.00%)      |
| 30-39            | 722,60 (16.48 %)    | 260 (4.77 %)             | 1 (0.08%)      |
| 40-49            | 676,027 (15.42 %)   | 473 (8.69 %)             | 17 (1.31 %)    |
| 50-59            | 790,64 (18.04 %)    | 977 (17.94 %)            | 38 (2.92 %)    |
| 60-69            | 650,315 (14.84 %)   | 971 (17.83 %)            | 94 (7.23 %)    |

|                                             |                    |                 |              |
|---------------------------------------------|--------------------|-----------------|--------------|
| 70-79                                       | 479,512 (10.94 %)  | 1,095 (20.11 %) | 268 (20.62%) |
| 80-89                                       | 237,794 (5.43 %)   | 1,156 (21.23 %) | 519 (39.92%) |
| 90+                                         | 48,054 (1.10 %)    | 365 (6.70 %)    | 363 (27.92%) |
| <b>BMI (integer):</b>                       |                    |                 |              |
| 0-19                                        | 111,507 (2.54 %)   | 206 (3.78 %)    | 99 (7.62 %)  |
| 20-24                                       | 629,181 (14.36%)   | 722 (13.26 %)   | 224 (17.23%) |
| 25-29                                       | 786,739 (17.95 %)  | 1,167 (21.43 %) | 239 (18.38%) |
| 30-34                                       | 446,822 (10.19 %)  | 873 (16.03 %)   | 149 (11.46%) |
| 35-39                                       | 190,695 (4.35 %)   | 439 (8.06 %)    | 52 (4.00 %)  |
| 40-51                                       | 103,238 (2.36 %)   | 297 (5.45 %)    | 28 (2.15 %)  |
| Missing                                     | 2,114,639 (48.25%) | 3,704 (68.01)   | 791 (60.85%) |
| <b>Townsend Deprivation Score Quintile:</b> |                    |                 |              |
| 1 (most affluent)                           | 878,046 (20.03 %)  | 861 (15.81 %)   | 226 (17.38%) |
| 2                                           | 876,583 (20.00 %)  | 958 (17.59 %)   | 275 (21.15%) |
| 3                                           | 872,528 (19.91%)   | 1,056 (19.39 %) | 285 (21.92%) |
| 4                                           | 867,483 (19.79 %)  | 1,231 (22.60 %) | 241 (18.54%) |
| 5 (least affluent)                          | 862,162 (19.67 %)  | 1,312 (24.09 %) | 256 (19.69%) |
| Missing                                     | 26,019 (0.59%)     | 28 (0.51%)      | 17 (1.30%)   |
| <b>Chronic Kidney Disease:</b>              |                    |                 |              |
| No CKD                                      | 4,241,17 (96.78%)  | 4,563 (83.79%)  | 974 (74.92%) |
| CKD 3                                       | 131,656 (3.00%)    | 780 (14.32%)    | 293 (22.54%) |
| CKD 4                                       | 5,561 (0.13%)      | 52 (0.95%)      | 25 (1.92%)   |
| CKD 5                                       | 4,128 (0.09%)      | 51 (0.94%)      | 8 (0.62%)    |
| Atrial Fibrillation                         | 96,079 (2.19%)     | 562 (10.32%)    | 230 (17.69%) |
| Asthma                                      | 502,372 (11.46%)   | 867 (15.92%)    | 121 (9.31%)  |
| Blood cancer                                | 19,241 (0.44%)     | 101 (1.85%)     | 25 (1.92%)   |
| Congestive Cardiac Failure                  | 43,523 (0.99%)     | 309 (5.67%)     | 121 (9.31%)  |
| Cerebral Palsy                              | 5,240 (0.12%)      | 13 (0.24%)      | 0 (0.00%)    |
| Coronary heart disease                      | 182,610 (4.17%)    | 834 (15.31%)    | 291 (22.38%) |
| Liver cirrhosis                             | 21,399 (0.49%)     | 84 (1.54%)      | 29 (2.23%)   |
| Congenital heart disease                    | 33,861 (0.77%)     | 99 (1.82%)      | 25 (1.92%)   |
| COPD                                        | 121,353 (2.77%)    | 555 (10.19%)    | 155 (11.92%) |
| Dementia                                    | 35,575 (0.81%)     | 374 (6.87%)     | 468 (36.00%) |
| Diabetes Type 1                             | 19,236(0.44%)      | 53 (0.97%)      | 9 (0.69%)    |

|                                                            |                  |                |              |
|------------------------------------------------------------|------------------|----------------|--------------|
| Diabetes Type 2                                            | 232,416 (5.30%)  | 1,015 (18.64%) | 256 (19.69%) |
| Epilepsy                                                   | 56,987 (1.30%)   | 154 (2.83%)    | 37 (2.85%)   |
| Hip, wrist, spine, humerus fracture                        | 168,348 (3.84%)  | 539 (9.90%)    | 231 (17.77%) |
| Neurological conditions                                    | 16,386 (0.37%)   | 45 (0.83%)     | 12 (0.92%)   |
| Parkinson's                                                | 8,910 (0.20%)    | 73 (1.34%)     | 38 (2.92%)   |
| Pulmonary hypertension                                     | 8,145 (0.19%)    | 67 (1.23%)     | 17 (1.31%)   |
| Cystic fibrosis, bronchiectasis or alveolitis.             | 20,870 (0.48%)   | 100 (1.84%)    | 21 (1.62%)   |
| Peripheral vascular disease                                | 39,877 (0.91%)   | 199 (3.65%)    | 57 (4.38%)   |
| SLE or rheumatoid arthritis                                | 42,156 (0.96%)   | 135 (2.48%)    | 36 (2.77%)   |
| Lung, oral cancer                                          | 9,934 (0.23%)    | 61 (1.12%)     | 17 (1.31%)   |
| Severe mental illness                                      | 484,985 (11.07%) | 968 (17.77%)   | 194 (14.92%) |
| Sickle cell disease or combined immune deficiency syndrome | 2,696 (0.06%)    | 7 (0.13%)      | 0 (0.00%)    |
| Stroke, transient ischaemic attack                         | 108,763 (2.48%)  | 596 (10.94%)   | 262 (20.15%) |
| Venous thromboembolism                                     | 68,193 (1.56%)   | 323 (5.93%)    | 111 (8.54%)  |

BMI - body mass index, COPD – chronic obstructive pulmonary disease,

SLE - systemic lupus erythematosus, motor neurone disease, multiple sclerosis, myaesthesia, or Huntingtons's chorea.
